# Supplementary material for: Transfusion of packed red blood cells at the end of shelf life is associated with increased risk of mortality – a pooled patient data analysis of 16 observational trials
Source: PubMed Central journal article supplement — Haematologica. 2018 May 24;103(9):1542–8. doi: 10.3324/haematol.2018.191932 (PMC6119129; doi:10.3324/haematol.2018.191932), 2018-09
Supplement: 2018_191932-Disclosures_and_Contributions.pdf [file 2018_191932-Disclosures_and_Contributions.pdf]

Haematologica  
HAEMATOL/2018/191932  
Version 3

Transfusion of packed red blood cells at the end of shelf life is associated with increased risk of mortality - a pooled patient data analysis of 16 observational trials

Monica S.Y. Ng, Michael David, Rutger A. Middelburg, Angela S.Y. Ng, Jacky Y. Suen, John-Paul Tung, and John F. Fraser

Disclosures: None

Contributions: MSYN conceptualised study and wrote manuscript. MSYN and ASYN collated data for analysis. MD performed data analysis. RAM, JYS and JPT assisted with data interpretation and editing paper. JPT and JFF supervised study.
